# Supplementary material for: Evaluation of a semiquantitative SNAP test for measurement of bile acids in dogs
Source: PeerJ. 2014 Aug 26;2:e539. doi: 10.7717/peerj.539 (PMC4157295; doi:10.7717/peerj.539)
Supplement: Figure S1 — Patient information collected including bile acid value, SNAP value, diagnosis if known (key is on separate tab), and Protein C value when available. Please note the diagnosis and protein C value were not included in the results of this study. [file peerj-02-539-s001.xlsx]

## Sheet: intra-assay variability
Sample 42 (Hitachi pre-freeze (1/26)= 85
	pooled sample 1	pooled #2	pooled #3	pooled #4	pooled #5
Hitachi post freeze (4/25	87	97
SNAP 1	>30	>30	8	11	>30
SNAP 2	>30	>30	10	17	>30
SNAP 3	>30	>30	7	13	>30
SNAP 4	>30	>30	10	8	>30
SNAP 5	>30	>30	12	<5	>30
SNAP 6	>30	>30	<5	12	>30
SNAP 7	>30	>30	<5	10	>30
SNAP 8	>30	>30	<5	6	>30
SNAP 9	>30	>30	9	10	>30
SNAP 10	>30	>30	7	11	>30

## Sheet: method comparison
	Date run	Patient Name	Number	Breed	Age	pre or post	Hitachi	SNAP	Diagnosis	Dx obtained how	date collected	# days frozen	Protein C
1	2012-05-31	Sicille English	218755	mixed	8	pre	22	27	1	explore and bx: shunt	2011-12-15		31
2	2012-05-31	Bear Simpson	227459	yorkshire terrier	2		89	>30	1	hepatic vasc anaomaly- explore, bx	2011-12-13
3	2012-05-31	Gretta Stogsdi	230424	yorkie	1	pre	2	7	--	no dx, no nuc scin	2012-04-23		70
4	2012-05-31	Caya Chambers	230984	havanese	6 mo	post	68	>30	1	surgery, bx	2012-05-10
5	2012-05-31	Mister B Eakin	214625	lab	2 yr	pre	0	<5	0	MRI, idiopathic epilepsy	2012-05-10
6	2012-05-31	Regan	227218	yorkie	1 yr		5	>30	1	explore, bx	2011-12-01		10
7	2012-05-31	Tigger Fitch	230987	yorkie	4 yr		99	>30	1	explore, bx	2012-05-10		24
8	2012-05-31	Lady Stricklin	227320	silky terrier	2		40	>30	0	negative scintigraphy			79
9	2012-05-31	Rocky Hibben	211074	yrokie	2	pre	18	16	0	post ligation bile acids
10	2012-05-31	Jag Spielmann	230227	yorkie	3	post	32	23	1	surgery, bx	2012-04-17		42
11	2012-05-31	Gigi Matthews	227217	yorkie	6 yr		28	>30	1	surgery, bx	2011-12-01		77
12	2012-05-31	Gracie Mae Kyzar	227528	pug	3 yr		150	>30	1	surgery, bx	2011-12-15		12
13	2012-06-01	Jag Spielmann	230227			pre	151	>30	1		2012-04-17
14	2012-06-01	Pancake Knight	228895	mini schnauzer	6	post	33	>30	1	liver bx: copper accumulation, glycogen accumulation, MVD	2012-02-23
15	2012-06-01	Caya Chambers	230984			pre	69	>30	1		2012-05-10
16	2012-06-01	Brando	211779	GSD	4	post	2	<5	--		2012-01-17
17	2012-06-01	Bear Womack	213298	Rottweiler	5	pre	2	<5	0		2012-01-04
18	2012-06-01	Emma Herston	227878	mixed	13	post	16	11	0	dx with hyperadrenocorticism, adrenal mass	2012-01-10
19	2012-06-01	Abby Siegel	219971	yorkie	9 mo	post	14	17	0	neg scin	2012-01-11
20	2012-06-01	Abby Siegel	219971			pre	3	<5	0		2012-01-11
21	2012-06-01	Scruffy Cooper	226876	mixed	3 yr	pre	173	>30	2	explore: multiple acquired	2011-11-15		43
22	2012-06-01	Zorro Mentzer	227122	pomeranian	3 yr	pre	3	<5	0	negative scint, NORMAL liver bx			58
24	2012-06-01	Henry Hazenfield	CH010323			pre	15	12	--
25	2012-06-01	Macgyver				pre	0	<5	--
26	2012-06-01	Brandy Ingram	230073	yorkie	4		141	>30	--		2012-04-11		39
28	2012-06-06	Calvin Demoiny	231210	yorkie	4 mon		68	>30	1	explore, bx	2012-05-17		15
29	2012-06-06	Bella Wagner	227817	maltese	1 yr		27	>30	1	explore, bx	2012-01-05		31
30	2012-06-06	Bebe Thompson	227440	yorkie	6 mo		92	>30	0	neg scin, dx with hydrocephalus, chiari	2011-12-12
31	2012-06-06	Gus				pre	2	18	--
32	2012-06-06	Angel McNally	230459	lab	13 yr	pre	2	7	0	idiopathic epilepsy	2012-04-30
33	2012-06-06	Molly McClain	222094	maltese	7 yr		40	>30	1	surgery, bx	2012-05-01		40
34	2012-06-06	Gus				post	6	22	--
35	2012-06-06	Marnie Stricklin	227321	silky terrier	2 yr		4	14	0	negative scintigraphy	2011-12-06		72
36	2012-06-06	Yoyo Renfro	19771			pre	14	22	--
37	2012-06-06	Diva Kiech	227473	yorkie	5 mo		59	>30	1	explore, bx	2011-12-13		11
38	2012-06-06	Buster Maples				post	5	23	--
39	2012-06-06	Lacy Tucker	164874	cocker spaniel	9 yr	pre	156	>30	1	portal hypertension	2012-04-25
40	2012-06-06	Pika	227011	yorkie	9 mo		53	>30	1	explore, bx	2011-11-21		66
41	2012-06-06	Zoe Kordistos	227212	havanese	8 mo		57	>30	2	bx: MVD (nuc scin negative)	2011-12-01		52
42	2012-06-06	Spike Dicaro	227994	yorkie	2 yr	pre	43	>30	2	scin: mult acquired, bx:	2012-01-12		21
43	2012-06-06	Tasha Biggerstaff	195422	mini schnauzer	4 yr		4	9	1	nuc scin	2011-10-20		108
44	2012-06-07	Rocky Hibben	211074			post	20	28	0
45	2012-06-07	Bandit Emes				pre	6	12	--
46	2012-06-07	Murphy Goins	227388	yorkie	7 mo		1	12	0	negative scintigraphy			87
47	2012-06-07	Petie Fulgham	223037	toy poodle	12 yr	post	51	>30	1	bx: cholangitis, liogranulomas, inflammatory process	2012-01-05
48	2012-06-07	Gretta Stogsdi	230424			post	26	>30	--		2012-04-23		70
49	2012-06-07	Budder Scarborough	227120	mini schnauzer	6 mo		18	>30	1	explore, bx	2011-11-30		16
50	2012-06-07	Bailey O Rourke	227324	mixed	6 mo		119	>30	1	explore, bx	2011-12-06		21
51	2012-06-07	Brando Ivins	211779			pre	1	12	--		2012-01-17
52	2012-06-07	Lilly Powell				pre	1	<5	--
53	2012-06-07	Mitzi Bitzi McCurry	227923	shih tzu	9 mo		10	13	0	post ligation bile acids
54	2012-06-07	Bandit Emes				post	11	19
55	2012-06-07	Lilly Powell				post	2	7	--
56	2012-06-07	Henry Hazenfield				post	2	6	--
57	2012-06-07	Rathe Hickok					9	18	--
58	2012-06-07	Bear Womack	213298			post	3	<5	0		2012-01-04
59	2012-06-07	Angel McNally	230459			post	10	15	0		2012-04-30
60	2012-06-08	Shadow Bohanan				pre	99	>30	--
61	2012-06-08	Riley Snediker	231457	mixed breed	3 yr	pre	9	7	1	nuc scin	2012-05-24
62	2012-06-08	Lexi Bright	199080	shih tzu	8 yr	post	9	6	0	dx: GME	2012-05-24
63	2012-06-08	Rocky Green	226585	Chihuahua	2 yr		21	28	1	explore, bx	2011-11-01		46
64	2012-06-08	Chyna Anderson	231445	yorkie	4 mon	pre	1	<5	0	negative scintigraphy	2012-05-24		34
65	2012-06-08	Macgyver				post	0	<5	--
66	2012-06-08	Chyna Anderson	231445			post	2	<5	0		2012-05-24
67	2012-06-08	Max Harris	231732	mini schnauzer	6 mo	post	121	>30	1	explore, bx	2012-06-05		17
68	2012-06-08	Frodo Wilson	183267	welsh terrier	6 yr	post	0	<5	0	diagnosed with definitive GI disease	2012-06-07
69	2012-06-08	Chanel Champagne	227826	yorkie	2 yr	pre	13	18	1	explore, bx	2012-01-05		25
70	2012-06-08	Jade Pape				pre	2	<5	--
71	2012-06-08	Kelsey Kirby	224322	cocker spaniel	2 yr	post	39	>30	2	bx: copper accumulation	2012-06-05
72	2012-06-08	Lexi Bright	199080			pre	8	<5	0		2012-05-24
73	2012-06-08	Maggie May Tucker	221788	cocker spaniel	4 yr	post	12	20	--		2012-06-05
74	2012-06-08	Kelsey Kirby	224322			pre	2	<5	2		2012-06-05
75	2012-06-08	Jade Pape				post	4	7	--

## Sheet: key
Diagnosis
0	not a shunt or closed shunt (negative nuc scin or CT or bx)
1	is a shunt
2	confirmed OTHEr hepatic dz with biopsy
--	no diagnosis
